# Supplementary material for: Preparation and Performance Verification of a Solid Slow-Release Carbon Source Material for Deep Nitrogen Removal in Urban Tailwater
Source: MDPI journal article supplement (doi:10.3390/molecules29092031), 2024-04-28
Supplement: s1 [file s1]

## 1. Preparation of SRCs

**Step 1** The DF, PHA, and HPMC were weighed separately and mixed evenly, and the mass ratio of DF, PHA, and HPMC was (20~40) : (30~50) : (20~30).

**Step 2** Based on reports by Yeum et al. [24],  $\text{Fe}_3\text{O}_4$  powder with a mass fraction of 3% was added to the above mixture in Step 1 and then mixed evenly.

**Step 3** Sodium silicate solution, with a mass concentration of 50%, was added to the evenly mixed mixture in Step 2 and then stirred evenly. The mass ratio of the sodium silicate solution to the evenly mixed mixture in Step 2 was 1:1 ~ 1:2.

**Step 4** The mixture in Step 3 was placed in an oven and sintered at a high temperature of 260°C for 2 h, and then cooled to room temperature to obtain the SRC.

**Step 5** The obtained SRC was broken and screened, and the particle size of the carbon source material for subsequent experiments was 0.5~0.8 cm.

## 2. SEM-EDS

(1) The filler was collected to be analyzed and placed in a centrifugal tube. The filler was cleaned with deionized water three to four times, and the supernatant was discarded.

(2) A phosphate buffer of 0.1 M containing 2.5% glutaraldehyde (pH = 7.1) was prepared in advance, and the sample was soaked in the phosphate buffer, and placed in a refrigerator at 4°C for 12 h to achieve fixation.

(3) After fixation, the sample was soaked in the phosphate buffer for 10 min, and then, the sample was cleaned with 25%, 50%, and 75% ethanol every 10 min, successively; finally, the sample was soaked twice (10 min each time) in 100%

ethanol to complete the dehydration operation.

(4) The dehydrated sample was soaked twice (5 min each time) in hexamethyldisilane, and then placed in a fume hood to air dry for at least 2 h.

(5) Gold was sprayed on the dried sample for analysis measurements.
